# Supplementary material
Source: publisher site journal article supplement (https://www.spandidos-publications.com/716/downloadSupplementary)

Figure S1. Representative flow cytometry images for the results in Fig. 8. (A) H446. (B) A549. Suspended cells were labeled with CD133-PE and CD44-Alexa Fluor 488 antibodies. Top left, CD133<sup>+</sup> and CD44<sup>+</sup>; top right, CD133<sup>+</sup> and CD44<sup>-</sup>; lower left, CD133<sup>-</sup> and CD44<sup>+</sup>; lower right, CD133<sup>-</sup> and CD44<sup>-</sup>. CD133-NM-Gef, CD133 aptamer-conjugated gefitinib 1,2-distearoyl-sn-glycero-3-phosphoethanolamine-polyethylene glycol-2000 nanomicelles; PE, phycoerythrin.

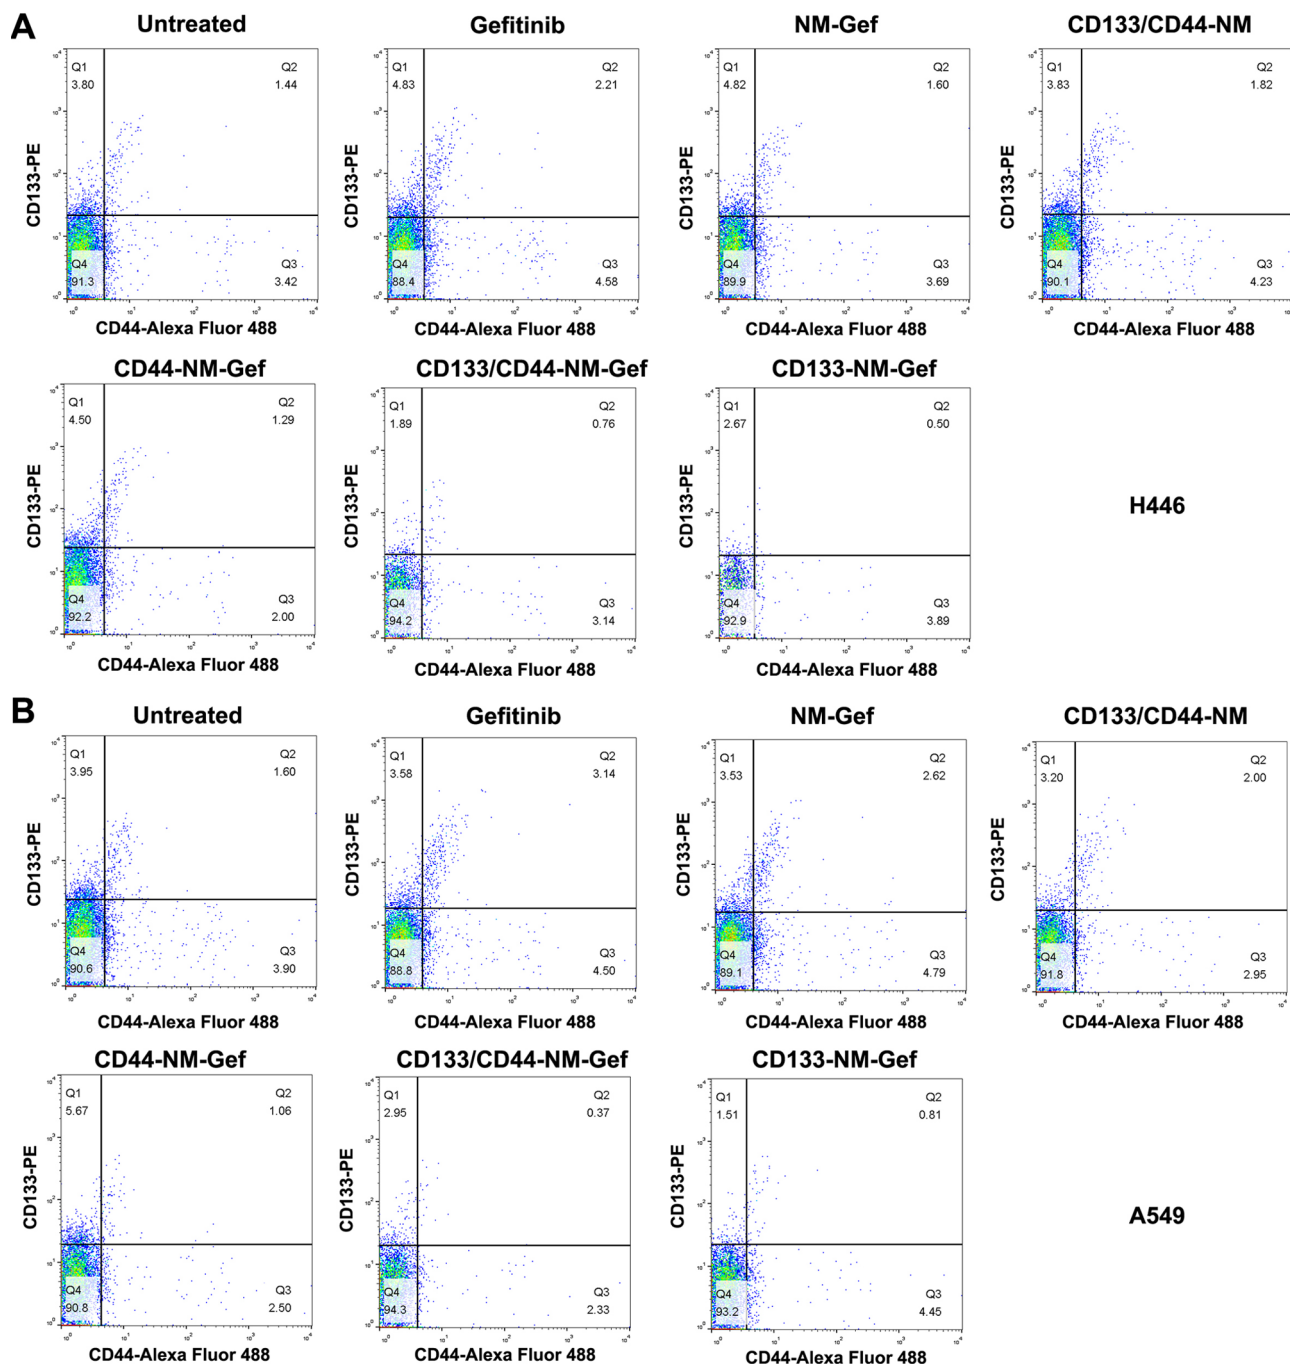

Supplement: Supplementary file 1 [file downloadSupplementary]
